# Supplementary material for: The diverse roles of DNA methylation in mammalian development and disease
Source: Springer Nature journal article supplement (doi:10.1038/s41580-019-0159-6), 2019-08-09
Supplement: 41580_2019_159_MOESM1_ESM.pdf [file 41580_2019_159_MOESM1_ESM.pdf]

# The diverse roles of DNA methylation in mammalian development and disease

---

*Maxim V. C. Greenberg and Deborah Bourc'his*

<https://doi.org/10.1038/s41580-019-0159-6>

## Supplementary Box 1. The players of DNA methylation and de-methylation

Many studies, some of which are very recent, explain the mechanistic underpinnings of DNA methylation. Here we elaborate on our discussion of this topic in main text of the article.

### De novo DNA methylation

The *de novo* DNMTs can methylate unmodified cytosines in all contexts, with the strongest preference for CpG dinucleotides, followed by CpA<sup>1-3</sup>. Such sequence specificity is achieved by the target recognition domain of DNMT3A, which contains an arginine residue that contacts CpG dinucleotides<sup>4</sup>. Given the conservation of the target recognition domain, a similar mechanism likely applies to DNMT3B. However, cell types with high DNMT3 expression exhibit substantial non-CpG methylation, such as mouse and human embryonic stem cells (ESCs)<sup>1,5,6</sup>, neuronal cell types<sup>7,8</sup> and germline cells<sup>9-11</sup>. Therefore, the CpG preference does not absolutely preclude non-CpG methylation *in vivo*.

In addition to the active *de novo* DNA methyltransferases, there is also a catalytically inactive DNMT, DNMT3L. DNMT3L interacts with both DNMT3A and DNMT3B<sup>12</sup>, and structural data indicate that DNMT3L exists in a heterotetrameric configuration with DNMT3A or DNMT3B<sup>4,13,14</sup>. DNMT3L stimulates the enzymatic activity of DNMT3A and DNMT3B by inducing a conformational change that promotes binding to DNA and to the methyl-donor, S-adenosyl-L-methionine<sup>15-17</sup>. Intriguingly, DNMT3L is dispensable for *de novo* DNA methylation in the embryo, but is absolutely required for establishing DNA methylation in both the male and female germline<sup>18,19</sup>. As such, homozygous null *Dnmt3L* mice of both sexes are viable, but completely infertile. The explanation for the discrepancy in the requirement for DNMT3L between the embryonic and germline *de novo* DNA methylation programs is yet to be fully understood. However, it is noteworthy that embryonic *de novo* methylation takes place in dividing cells, whereas germline *de novo* DNMT3L-dependent methylation occurs in mitotically arrested cells in both sexes.

As discussed in the main text, the DNMT ADD domain binds to H3K4, but is sensitive to H3K4 methylation. Mutations generated in the ADD domain can bypass its repulsion by H3K4 methylation; in mouse ESCs, this leads to aberrant promoter DNA methylation of developmental genes (but not housekeeping genes) and failure to differentiate, underscoring the importance of ADD-based DNMT3 targeting<sup>20</sup>. Beyond its role in diverting DNMT3 from H3K4me3-marked promoters, the ADD is also sensitive to H3 threonine 3 phosphorylation (H3T3ph)<sup>21</sup>, which is a modification found at mitotic centromeres<sup>22-24</sup>. DNMT3A with an engineered ADD domain that is insensitive to H3T3ph remains bound to centromeres during mitosis, leading to genome instability<sup>20</sup>. Thus, the ADD domain is a versatile module that prevents ectopic DNA methylation in different contexts.

The DNMT PWWP domain recognizes H3K36me3. Curiously, despite containing a PWWP domain, DNMT3A shows no preference for transcribed gene bodies (which are marked by H3K36me3) in mouse ESCs<sup>25</sup>. Yet in the female germline, there is strong evidence that it is DNMT3A that methylates gene bodies<sup>26–31</sup>, although it is not known whether this depends on the PWWP domain. This may be another example wherein the *de novo* DNA methylation machinery has adopted different functions in the germline. In sum, the PWWP and ADD domains combine to direct and restrict the targeting of the DNMT3 enzymes targeting in mammalian genomes. In fact, simply expressing a murine DNMT3B in baker's yeast — which has a DNA methylation-free genome — largely recapitulates a mammalian DNA methylation landscape: enrichment at gene bodies and absence at gene promoters<sup>32</sup>.

Considering the high degree of conservation between the PWWP, ADD and methyltransferase (MTase) domains of DNMT3A and DNMT3B, what could explain the different target specificities of the two proteins, especially in cell types in which both are highly expressed, such as ESCs? A likely possibility is that target specificity depends on interactions mediated by their less conserved amino-termini. Moreover, various isoforms of both DNMT3 proteins exist, potentially broadening their functional repertoires. DNMT3A has only two major isoforms, both of which are catalytically active. By contrast, DNMT3B has 30 reported isoforms, some catalytically active and some inactive<sup>33–37</sup>, and the majority of them are conserved between mice and humans<sup>38</sup>.

Recent work has begun to shed light on the functions of some specific DNMT3 isoforms. In a human colon cancer cell line, an MTase-less isoform of DNMT3B lacks catalytic activity but stimulates *de novo* DNA methylation as an accessory factor, akin to DNMT3L<sup>37</sup>. It remains to be determined in whether and in what healthy, physiological contexts this activity is relevant. The long isoform of DNMT3A (DNMT3A1) is the less expressed of the two DNMT3A isoforms in mouse ESCs. However, two studies indicate that DNMT3A1 has a specific role at the boundaries of bivalent promoters<sup>39,40</sup>, which are promoters marked by both H3K4me3 and H3K27me3; the latter is deposited by Polycomb repressive complex 2. Bivalent promoters are developmentally important<sup>41–43</sup>, and the studies point to an intriguing role of DNMT3A1 in their regulation. Although there seems to be some interplay between DNMT3A1 and the Polycomb machinery, the precise function of DNMT3A1 at bivalent promoters has not been fully elucidated. DNMT3A2 appears to have a specific neuronal function, and decreased expression of *Dnmt3A2* in aging mice is associated with reduced cognitive abilities<sup>44</sup>. Understanding the roles of the multitude of DNMT3 isoforms will be worthwhile moving forward and could potentially resolve the functional differences between *de novo* DNA methylation mechanisms in embryos, the germline and somatic tissue types. Additionally, expression of aberrant isoforms may help explain DNA methylation deregulation in cancer<sup>37</sup>.

## **Maintenance DNA methylation**

In the main text we discuss the interplay between DNMT1 and UHRF1 with histone post-translational modifications (FIG. 1c). Interestingly, DNA ligase 1 (LIG1), which is part of the DNA replication machinery, contains a sequence with high similarity to the histone H3 tail. This sequence also undergoes lysine methylation and as such, can recruit UHRF1<sup>45</sup>. UHRF1 can ubiquitylate non-histone proteins involved in replication, which potentially could diversify the modes of DNMT1 recruitment to the replication fork<sup>46</sup>. Non-histone proteins could assist in DNA methylation maintenance in histone poor regions and/or regions devoid of H3K9 methylation.

Finally, two recent studies used EdU and BrdU labeling followed by immunoprecipitation and bisulfite sequencing to determine the kinetics of maintenance of DNA methylation on newly synthesized DNA<sup>47,48</sup>. Even though both studies used the same human ESC line, their results were discordant: one study reported that maintenance methylation is rapid and takes 20 minutes to complete from the time of DNA synthesis, whereas the other indicated that the process takes several hours<sup>48</sup>. Further work is needed to resolve this discrepancy, as well assign possible functional relevance to these results. It should also be noted that studying DNA methylation maintenance in ESCs is complicated by the occurrence of *de novo* DNA methylation and demethylation in addition to the activity of the DNMT1 pathway<sup>49</sup>.

### **DNA de-methylation**

In mammals, there are three TET methylcytosine dioxygenases; they are all able to oxidize 5mC but are expressed in different stages of development. TET1 and TET3 contain a CxxC domain that binds to unmethylated CpG-rich regions<sup>50</sup> known as CpG islands (CGIs). Given that the majority of CGIs in mammals are unmethylated<sup>51,52</sup> and that TET1 and TET3 contain an intrinsic sequence-based recruitment module<sup>53,54</sup>, it was suggested that TET proteins counteract DNA methylation at CGIs. TET-mediated regulation at CGI promoters may be important in some contexts<sup>55</sup>: human *TET1* mutant ESCs exhibit a moderate gain of DNA methylation at bivalent CGIs, and this leads to a defect in neural differentiation. However, in triple-*TET* knockout mouse ESCs, the biggest gain of 5mC is at enhancers, with only modest effect at CGI promoters<sup>56,57</sup>. The stemness properties of these cells are mostly unaffected, but differentiation is impaired<sup>58</sup>, which likely reflects enhancer deregulation. These cellular phenotypes are borne out *in vivo*: triple-*TET* knockout mouse embryos exhibit pronounced defects at gastrulation, due to defective enhancer activation of *Lefty-Nodal* signalling<sup>59</sup>. In fact, TET-mediated regulation of enhancers during early embryogenesis appears to be a conserved feature across vertebrates: the phylotypic period (a highly conserved phase when the vertebrate body plan is shaped) is marked by wide-spread enhancer demethylation in mice, *Xenopus laevis* and zebrafish<sup>60</sup>.

Finally, it should be noted that the TETs carry out a number of functions in addition to DNA demethylation (reviewed in <sup>62</sup>). Several readers specifically recognize 5hmC. Although some readers may be involved in the DNA demethylation process, there are indications that others may

affect gene regulation *per se*. For example, UHRF2 is a highly similar paralog to UHRF1, but preferentially binds 5hmC as opposed to 5mC<sup>63,64</sup>. *Uhrf2* knockout mice exhibit reduced 5hmC in the brain and behavioural abnormalities<sup>65</sup>. Importantly, TET1 seems to be an important regulator of embryonic development in mice, completely independently of its catalytic activity<sup>61</sup>. Incidentally, the same study noted that the developmental defects in *Tet* mutants are more pronounced in non-inbred mouse strains than in inbred strains<sup>61</sup>. Future work should distinguish the roles of TET enzymes in active DNA methylation from other means of transcriptional control.

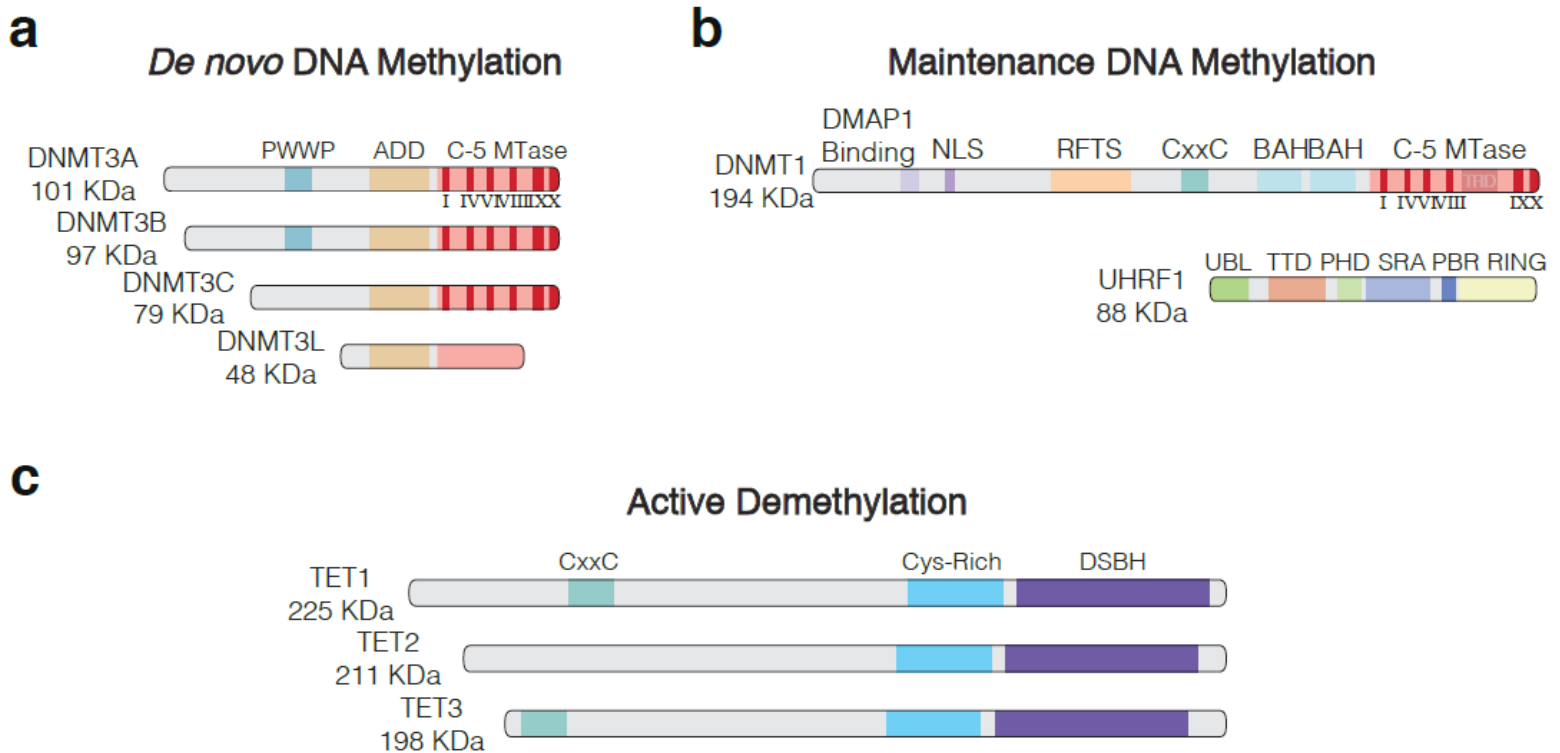

### Supplementary Figure 1. Major domains of DNA methylation and de-methylation proteins

- Domain architecture of *de novo* DNA methyltransferases. DNMT3A and DNMT3B contain the H3K4-binding ADD domain and H3K36me3-binding PWWP domain, in addition to the MTase domain in the carboxy-terminus. Their amino-termini are more divergent. DNMT3C is a Muroidea-specific duplication of DNMT3B that has lost its PWWP domain. DNMT3L is a catalytically inactive co-factor that stimulates the catalytic activity of DNMT3A and DNMT3B.
- Domain architecture of the key DNA methylation maintenance proteins. DNMT1 contains a number of conserved domains involved in DNA targeting, including the DMAP1-binding, RFTS and CxxC. The precise function of the bromo-adjacent homology (BAH) domains is unclear. UHRF1 is required for the recruitment of DNMT1 to DNA replication forks through an intricate mechanism.

- c. Conserved domains of the three TET proteins. The carboxy-terminal Cysteine-Rich and double-stranded  $\beta$ -helix (DSBH) domains confer catalytic activity. TET1 and TET3 harbour a CxxC domain, which binds to unmethylated CpG-rich regions.

### **Supplementary Box 2: Low input and single-cell DNA methylation techniques**

Whole genome bisulfite sequencing (WGBS) allows assessment of the DNA methylome in single nucleotide resolution. During chemical treatment with sodium bisulfite, unmethylated cytosines are deaminated, while methylated cytosines remain intact. Following a desulphonation treatment, deaminated cytosines are converted to uracils, which are read as thymines by the DNA polymerase during PCR amplification. Thus, upon sequencing, the remaining cytosines are considered as methylated (or hydroxymethylated). Although the procedure is straightforward and many commercial kits are available, a major drawback of WGBS is that during the process a large proportion of the DNA becomes degraded<sup>66</sup>. Thus, it is a challenge to generate WGBS libraries when the amount of available tissue is limited.

A number of techniques have been developed to circumvent this problem and enable the use of low amounts of cellular material in DNA methylome assays. Reduced representation bisulfite sequencing (RRBS) uses the restriction enzyme *MspI*, which recognizes the CCGG motif and is insensitive to CpG methylation to digest genomic DNA<sup>67,68</sup>. By excising small DNA fragments from gels, CpG-rich regions such as CpG islands (where *MspI* cuts more frequently) can be enriched for analysis. These fragments are subjected to adapter ligation, bisulfite conversion and sequencing. As extremely low input of DNA is required for RRBS, this technique is well-suited for working with low-cell numbers<sup>69</sup> and even with single cells<sup>70</sup>. Furthermore, it is more cost-effective than WGBS, because high genomic coverage can be achieved with less sequencing. However, although RRBS is superb for analysing CpG islands, a major drawback of the technique is that non-CpG-rich regions of the genome are depleted in the analysis. Thus, the resulting DNA methylome is incomplete.

In the original WGBS protocols, adapters are ligated prior to bisulfite conversion. Although this approach is convenient for amplifying properly bisulfite-converted DNA, a sizeable proportion of the adapters are degraded and many intact sequences are lost. In a technique named post-bisulfite adapter tagging (PBAT), bisulfite-treated DNA is amplified first and adapters are ligated afterwards<sup>71</sup>. Only very low input of DNA is therefore required for PBAT, making it compatible with single-cell analyses<sup>72</sup>. In a similar method, poly-C tails are added to post-bisulfite-treated DNA using terminal deoxynucleotidyl transferase<sup>73</sup>. The tails serve as primer binding sites, and adapters are ligated to double-stranded DNA. This technique, named small-scale TELP (tailing, elongation, ligation, PCR)-enabled methylome sequencing (STEM-seq), has also been applied with success on embryonic material<sup>74</sup>.

Finally, a clever method has been developed to simultaneously assess the DNA methylome as well as chromatin accessibility and nucleosome phasing. Named nucleosome occupancy and methylation sequencing (NOMe-seq)<sup>75</sup>, the technique uses the bacterial GpC methyltransferase *M.CviPI*, which preferentially methylates linker DNA between nucleosomes. Following bisulfite conversion, cytosines methylated in the GpC context designate inter-nucleosomal DNA; simultaneously, cytosines methylated in the CpG context reveal the endogenous DNA methylome. NOMe-seq has been paired with PBAT to reveal single-cell nucleosome occupancy and methylation patterns<sup>76</sup> (this is also called single-cell chromatin overall omic-scale landscape sequencing (scCOOL-seq))<sup>77,78</sup>, and has even been combined with single cell RNA-seq in the same experiment<sup>79</sup>. Overall, the past several years have borne witness to increase in the amount of DNA methylation data that can be derived from using minimal amounts of cellular material.

## References

1. Ramsahoye, B. H. *et al.* Non-CpG methylation is prevalent in embryonic stem cells and may be mediated by DNA methyltransferase 3a. *Proc. Natl. Acad. Sci. U. S. A.* **97**, 5237–42. (2000).
2. Aoki, A. *et al.* Enzymatic properties of de novo-type mouse DNA (cytosine-5) methyltransferases. *Nucleic Acids Res.* **29**, 3506–3512 (2001).
3. Gowher, H. & Jeltsch, A. Enzymatic properties of recombinant Dnmt3a DNA methyltransferase from mouse: the enzyme modifies DNA in a non-processive manner and also methylates non-CpA sites. *J Mol Biol* **309**, 1201–8. (2001).
4. Zhang, Z. M. *et al.* Structural basis for DNMT3A-mediated de novo DNA methylation. *Nature* **554**, 387–391 (2018).
5. Lister, R. *et al.* Human DNA methylomes at base resolution show widespread epigenomic differences. *Nature* **462**, 315–322 (2009).
6. Stadler, M. B. *et al.* DNA-binding factors shape the mouse methylome at distal regulatory regions. *Nature* **480**, 490–5 (2011).
7. Xie, W. *et al.* Base-Resolution Analyses of Sequence and Parent-of-Origin Dependent DNA Methylation in the Mouse Genome. *Cell* **148**, 816–831 (2012).
8. Lister, R. *et al.* Global epigenomic reconfiguration during mammalian brain development. *Science* **341**, 6146 (2013).
9. Tomizawa, S. *et al.* Dynamic stage-specific changes in imprinted differentially methylated regions during early mammalian development and prevalence of non-CpG methylation in oocytes. *Development* **138**, 811 LP – 820 (2011).
10. Smith, Z. D. *et al.* A unique regulatory phase of DNA methylation in the early mammalian

- embryo. *Nature* **484**, 339–344 (2012).
11. Ichiyanagi, T., Ichiyanagi, K., Miyake, M. & Sasaki, H. Accumulation and loss of asymmetric non-CpG methylation during male germ-cell development. *Nucleic Acids Res.* **41**, 738–745 (2013).
  12. Ooi, S. K. *et al.* DNMT3L connects unmethylated lysine 4 of histone H3 to de novo methylation of DNA. *Nature* **448**, 714–717 (2007).
  13. Jia, D., Jurkowska, R. Z., Zhang, X., Jeltsch, A. & Cheng, X. Structure of Dnmt3a bound to Dnmt3L suggests a model for de novo DNA methylation. *Nature* **449**, 248–251 (2007).
  14. Jurkowska, R. Z. *et al.* Formation of nucleoprotein filaments by mammalian DNA methyltransferase Dnmt3a in complex with regulator Dnmt3L. *Nucleic Acids Res.* **36**, 6656–6663 (2008).
  15. Chedin, F., Lieber, M. R. & Hsieh, C. L. The DNA methyltransferase-like protein DNMT3L stimulates de novo methylation by Dnmt3a. *Proc. Natl. Acad. Sci. U. S. A.* **99**, 16916–16921 (2002).
  16. Suetake, I., Shinozaki, F., Miyagawa, J., Takeshima, H. & Tajima, S. DNMT3L stimulates the DNA methylation activity of Dnmt3a and Dnmt3b through a direct interaction. *J Biol Chem* **279**, 27816–27823 (2004).
  17. Gowher, H., Liebert, K., Hermann, A., Xu, G. & Jeltsch, A. Mechanism of stimulation of catalytic activity of Dnmt3A and Dnmt3B DNA-(cytosine-C5)-methyltransferases by Dnmt3L. *J Biol Chem* **280**, 13341–13348 (2005).
  18. Bourc'his, D., Xu, G. L., Lin, C. S., Bollman, B. & Bestor, T. H. Dnmt3L and the establishment of maternal genomic imprints. *Science* **294**, 2536–2539 (2001).
  19. Bourc'his, D. & Bestor, T. H. Meiotic catastrophe and retrotransposon reactivation in male germ cells lacking Dnmt3L. *Nature* **431**, 96–99 (2004).
  20. Noh, K. M. *et al.* Engineering of a Histone-Recognition Domain in Dnmt3a Alters the Epigenetic Landscape and Phenotypic Features of Mouse ESCs. *Mol. Cell* **59**, 89–103 (2015).
  21. Zhang, Y. *et al.* Chromatin methylation activity of Dnmt3a and Dnmt3a/3L is guided by interaction of the ADD domain with the histone H3 tail. *Nucleic Acids Res.* **38**, 4246–4253 (2010).
  22. Wang, F. *et al.* Histone H3 Thr-3 Phosphorylation by Haspin Positions Aurora B at Centromeres in Mitosis. *Science* **330**, 231 LP – 235 (2010).
  23. Kelly, A. E. *et al.* Survivin Reads Phosphorylated Histone H3 Threonine 3 to Activate the Mitotic Kinase Aurora B. *Science* **330**, 235 LP – 239 (2010).
  24. Yamagishi, Y., Honda, T., Tanno, Y. & Watanabe, Y. Two Histone Marks Establish the Inner Centromere and Chromosome Bi-Orientation. *Science* **330**, 239 LP – 243 (2010).
  25. Baubec, T. *et al.* Genomic profiling of DNA methyltransferases reveals a role for DNMT3B



- in genic methylation. *Nature* **520**, 243–7 (2015).
26. Kaneda, M. *et al.* Essential role for de novo DNA methyltransferase Dnmt3a in paternal and maternal imprinting. *Nature* **429**, 900–903 (2004).
  27. Kaneda, M. *et al.* Genetic evidence for Dnmt3a-dependent imprinting during oocyte growth obtained by conditional knockout with Zp3-Cre and complete exclusion of Dnmt3b by chimera formation. *Genes to Cells* **15**, 169–179 (2010).
  28. Chotalia, M. *et al.* Transcription is required for establishment of germline methylation marks at imprinted genes. *Genes Dev.* **23**, 105–117 (2009).
  29. Smith, E. Y., Futtner, C. R., Chamberlain, S. J., Johnstone, K. A. & Resnick, J. L. Transcription is required to establish maternal imprinting at the Prader-Willi syndrome and Angelman syndrome locus. *PLoS Genet.* **7**, (2011).
  30. Smallwood, S. A. *et al.* Dynamic CpG island methylation landscape in oocytes and preimplantation embryos. *Nat. Genet.* **43**, 811–814 (2011).
  31. Veselovska, L. *et al.* Deep sequencing and de novo assembly of the mouse oocyte transcriptome define the contribution of transcription to the DNA methylation landscape. *Genome Biol.* **16**, 209 (2015).
  32. Morselli, M. *et al.* In vivo targeting of de novo DNA methylation by histone modifications in yeast and mouse. *Elife* **4**, e06205 (2015).
  33. Xie, S. *et al.* Cloning, expression and chromosome locations of the human DNMT3 gene family. *Gene* **236**, 87–95. (1999).
  34. Ostler, K. R. *et al.* Cancer cells express aberrant DNMT3B transcripts encoding truncated proteins. *Oncogene* **26**, 5553–5563 (2007).
  35. Wang, J., Walsh, G., Liu, D. D., Lee, J. J. & Mao, L. Expression of  $\Delta$ DNMT3B variants and its association with promoter methylation of p16 and RASSF1A in primary non-small cell lung cancer. *Cancer Res.* **66**, 8361–8366 (2006).
  36. Gopalakrishnan, S. *et al.* A Novel DNMT3B Splice Variant Expressed in Tumor and Pluripotent Cells Modulates Genomic DNA Methylation Patterns and Displays Altered DNA Binding. *Mol. Cancer Res.* **7**, 1622–1634 (2009).
  37. Duymich, C. E., Charlet, J., Yang, X., Jones, P. A. & Liang, G. DNMT3B isoforms without catalytic activity stimulate gene body methylation as accessory proteins in somatic cells. *Nat. Commun.* **7**, 11453 (2016).
  38. Okano, M., Xie, S. & Li, E. Cloning and characterization of a family of novel mammalian DNA (cytosine-5) methyltransferases. *Nat. Genet.* **19**, 219–220 (1998).
  39. Manzo, M. *et al.* Isoform- specific localization of DNMT3A regulates DNA methylation fidelity at bivalent CpG islands. *EMBO J.* **36**, 3421–3434 (2017).
  40. Gu, T. *et al.* DNMT3A and TET1 cooperate to regulate promoter epigenetic landscapes in mouse embryonic stem cells. *Genome Biol.* **19**, 88 (2018).

41. Bernstein, E. *et al.* Mouse polycomb proteins bind differentially to methylated histone H3 and RNA and are enriched in facultative heterochromatin. *Mol Cell Biol* **26**, 2560–2569 (2006).
42. Azuara, V. *et al.* Chromatin signatures of pluripotent cell lines. *Nat. Cell Biol.* **8**, 532–538 (2006).
43. Mas, G. *et al.* Promoter bivalency favors an open chromatin architecture in embryonic stem cells. *Nat. Genet.* **50**, 1452–1462 (2018).
44. Oliveira, A. M. M., Hemstedt, T. J. & Bading, H. Rescue of aging-associated decline in Dnmt3a2 expression restores cognitive abilities. *Nat. Neurosci.* **15**, 1111 (2012).
45. Ferry, L. *et al.* Methylation of DNA Ligase 1 by G9a/GLP Recruits UHRF1 to Replicating DNA and Regulates DNA Methylation. *Mol. Cell* **67**, 550-565.e5 (2017).
46. Karg, E. *et al.* Ubiquitome Analysis Reveals PCNA-Associated Factor 15 (PAF15) as a Specific Ubiquitination Target of UHRF1 in Embryonic Stem Cells. *J. Mol. Biol.* **429**, 3814–3824 (2017).
47. Xu, C. & Corces, V. G. Nascent DNA methylome mapping reveals inheritance of hemimethylation at CTCF/cohesin sites. *Science* **359**, 1166 LP – 1170 (2018).
48. Charlton, J. *et al.* Global delay in nascent strand DNA methylation. *Nat. Struct. Mol. Biol.* **25**, 327–332 (2018).
49. Shipony, Z. *et al.* Dynamic and static maintenance of epigenetic memory in pluripotent and somatic cells. *Nature* **513**, 115–119 (2014).
50. Voo, K. S., Carlone, D. L., Jacobsen, B. M., Flodin, A. & Skalnik, D. G. Cloning of a mammalian transcriptional activator that binds unmethylated CpG motifs and shares a CXXC domain with DNA methyltransferase, human trithorax, and methyl-CpG binding domain protein 1. *Mol. Cell. Biol.* **20**, 2108–21 (2000).
51. Cooper, D. N., Taggart, M. H. & Bird, A. P. Unmethylated domains in vertebrate DNA. *Nucleic Acids Res.* **11**, 647–658 (1983).
52. Bird, A., Taggart, M., Frommer, M., Miller, O. J. & Macleod, D. A fraction of the mouse genome that is derived from islands of nonmethylated, CpG-rich DNA. *Cell* **40**, 91–99 (1985).
53. Xu, Y. *et al.* Genome-wide Regulation of 5hmC, 5mC, and Gene Expression by Tet1 Hydroxylase in Mouse Embryonic Stem Cells. *Mol. Cell* **42**, 451–464 (2011).
54. Xu, Y. *et al.* Tet3 CXXC domain and dioxygenase activity cooperatively regulate key genes for xenopus eye and neural development. *Cell* **151**, 1200–1213 (2012).
55. Verma, N. *et al.* TET proteins safeguard bivalent promoters from de novo methylation in human embryonic stem cells. *Nat. Genet.* **50**, 83–95 (2018).
56. Lu, F., Liu, Y., Jiang, L., Yamaguchi, S. & Zhang, Y. Role of Tet proteins in enhancer activity and telomere elongation. *Genes Dev.* **28**, 2103–2119 (2014).

57. Hon, G. C. *et al.* 5mC oxidation by Tet2 modulates enhancer activity and timing of transcriptome reprogramming during differentiation. *Mol. Cell* **56**, 286–297 (2014).
58. Dawlaty, M. M. *et al.* Loss of tet enzymes compromises proper differentiation of embryonic stem cells. *Dev. Cell* **29**, 102–111 (2014).
59. Dai, H. Q. *et al.* TET-mediated DNA demethylation controls gastrulation by regulating Lefty-Nodal signalling. *Nature* **538**, 528–532 (2016).
60. Bogdanovic, O. *et al.* Active DNA demethylation at enhancers during the vertebrate phylotypic period. *Nat Genet* **48**, 417–426 (2016).
61. Khoueiry, R. *et al.* Lineage-specific functions of TET1 in the postimplantation mouse embryo. *Nat Genet* **49**, 1061–1072 (2017).
62. Wu, X. & Zhang, Y. TET-mediated active DNA demethylation: Mechanism, function and beyond. *Nat. Rev. Genet.* **18**, 517–534 (2017).
63. Spruijt, C. G. *et al.* Dynamic Readers for 5-(Hydroxy)Methylcytosine and Its Oxidized Derivatives. *Cell* **152**, 1146–1159 (2013).
64. Zhou, T. *et al.* Structural Basis for Hydroxymethylcytosine Recognition by the SRA Domain of UHRF2. *Mol. Cell* **54**, 879–886 (2014).
65. Chen, R. *et al.* The 5-Hydroxymethylcytosine (5hmC) Reader UHRF2 Is Required for Normal Levels of 5hmC in Mouse Adult Brain and Spatial Learning and Memory. *J. Biol. Chem.* **292**, 4533–4543 (2017).
66. Grunau, C., Clark, S. J. & Rosenthal, A. Bisulfite genomic sequencing: systematic investigation of critical experimental parameters. *Nucleic Acids Res.* **29**, 65e – 65 (2001).
67. Meissner, A. *et al.* Genome-scale DNA methylation maps of pluripotent and differentiated cells. *Nature* **454**, 766–770 (2008).
68. Gu, H. *et al.* Preparation of reduced representation bisulfite sequencing libraries for genome-scale DNA methylation profiling. *Nat. Protoc.* **6**, 468–481 (2011).
69. Smallwood, S. A. & Kelsey, G. Genome-wide analysis of DNA methylation in low cell numbers by reduced representation bisulfite sequencing. *Methods Mol. Biol.* **925**, 187–197 (2012).
70. Guo, H. *et al.* Single-Cell methylome landscapes of mouse embryonic stem cells and early embryos analyzed using reduced representation bisulfite sequencing. *Genome Res.* **23**, 2126–2135 (2013).
71. Miura, F., Enomoto, Y., Dairiki, R. & Ito, T. Amplification-free whole-genome bisulfite sequencing by post-bisulfite adaptor tagging. *Nucleic Acids Res.* **40**, e136–e136 (2012).
72. Smallwood, S. A. *et al.* Single-cell genome-wide bisulfite sequencing for assessing epigenetic heterogeneity. *Nat. Methods* **11**, 817–820 (2014).
73. Peng, X. *et al.* TELP, a sensitive and versatile library construction method for next-generation sequencing. *Nucleic Acids Res.* **43**, e35 (2015).

74. Zhang, Y. *et al.* Dynamic epigenomic landscapes during early lineage specification in mouse embryos. *Nat. Genet.* **50**, 96–105 (2018).
75. Kelly, T. K. *et al.* Genome-wide mapping of nucleosome positioning and DNA methylation within individual DNA molecules. *Genome Res.* **22**, 2497–2506 (2012).
76. Pott, S. Simultaneous measurement of chromatin accessibility, DNA methylation, and nucleosome phasing in single cells. *Elife* **6**, e23203 (2017).
77. Guo, H. *et al.* DNA methylation and chromatin accessibility profiling of mouse and human fetal germ cells. *Cell Res.* **27**, 165–183 (2017).
78. Li, L. *et al.* Single-cell multi-omics sequencing of human early embryos. *Nat. Cell Biol.* **20**, 847–858 (2018).
79. Clark, S. J. *et al.* scNMT-seq enables joint profiling of chromatin accessibility DNA methylation and transcription in single cells. *Nat. Commun.* **9**, 781 (2018).
